# Supplementary material for: CircWHSC1 promotes ovarian cancer progression by regulating MUC1 and hTERT through sponging miR-145 and miR-1182
Source: PubMed Central journal article supplement (PMC6822369; doi:10.1186/s13046-019-1437-z), 2019-10-30
Supplement: 13046_2019_1437_MOESM1_ESM.pdf [file 13046_2019_1437_MOESM1_ESM.pdf]

**Additional file 1: Table S1:** circWHSC1 expression in normal ovary and ovarian carcinoma tissues

---

| <b>Groups</b>     | <b>N</b> | <b>circ WHSC1 expression / 18s</b> | <b><i>P</i> value</b> |
|-------------------|----------|------------------------------------|-----------------------|
| Normal ovary      | 13       | 1.65E-06 ±4.73E-07                 | <b><i>0.0184</i></b>  |
| Ovarian carcinoma | 79       | 3.59E-06 ±8.55E-07                 |                       |

---

Bold and Italics means  $P < 0.05$ .

**Additional file 1: Table S2:** Correlation of circWHSC1 expression with different clinicopathological features of ovarian carcinoma

| Clinicopathological features    | N  | circWHSC1 expression /<br>18s | <i>P</i> value      |
|---------------------------------|----|-------------------------------|---------------------|
| <b>The pathology types</b>      |    |                               | 0.357               |
| Serouscarcinoma                 | 58 | 3.34E-06 ±6.19E-06            |                     |
| The other pathology types       | 21 | 4.26E-06 ±1.07E-05            |                     |
| <b>Age</b>                      |    |                               | 0.340               |
| ≤52                             | 39 | 3.23E-06 ±5.97E-06            |                     |
| > 52                            | 40 | 3.94E-06 ±8.97E-06            |                     |
| <b>FIGO stages</b>              |    |                               | 0.330               |
| I-II                            | 28 | 4.18E-06 ±1.01E-05            |                     |
| III-IV                          | 51 | 3.26E-06 ±5.88E-06            |                     |
| <b>Pathology classification</b> |    |                               | <b><i>0.001</i></b> |
| Well                            | 12 | 7.07E-07±7.58E-07             |                     |
| Mod +Poor                       | 67 | 4.10E-06±8.15E-06             |                     |

Bold and Italics means  $P < 0.05$ .

**Additional file 1: Table S3:** The sequence of circWHSC1 is

TGTTCTAAGAACGGAAGCATCTGGGCTGGATGGAATTTAGCATCAAGCAGAGTCCCC  
TTTCTGTTTCAGAGTGTGTAAAGTGCATAAAGATGAAGCAGGCACCAGAAATCCTCG  
GCAGTGCCAACGGGAAGACTCCGAGCTGCGAGGTGAACCGCGAGTGTTCTGTGTTCC  
TCAGCAAAGCCCAGCTCTCCAGTAGCCTGCAGGAGGGGGTCATGCAGAAGTTTAACG  
GCCACGACGCCCTGCCCTTTATTCCAGCCGACAAGCTGAAAGATCTTACTTCCCGGG  
TGTTTAATGGAGAACC CGGCGCACACGATGCCAAACTGCGTTTTTGAGTCCCAGGAAA  
TGAAAGGGATTGGGACACCCCCTAACACTACCCCTATCAAAAATGGCTCTCCAGAAA  
TTAAGCTGAAAATCACAAAACATACATGAATGGGAAGCCTCTCTTTGAATCTTCCA  
TTTGTGGTGACAGTGCTGCTGATGTGTCTCAGTCAGAAGAAAATGGACAAAAACCAG  
AAAACAAGGCGAGAAGGAACAGGAAGAGGAGCATAAAATATGACTCCTTGCTGGAGC  
AGGGCCTTGTGCGAAGCAGCTCTTGTGTCTAAGATCTCAAGTCCTTCAGATAAAAAGA  
TTCCAGCTAAGAAAGAGTCTTGTCCAAACACTGGAAGAGACAAAGACCACCTGTTGA  
AATAACAACGTTGGTGATTTGGTGTGGTCCAAAGTGTGGGTTACCCTTGGTGGCCTT  
GCATGGTTTTCTGCAGATCCACTCCTTCACAGCTATAACCAAACCTTAAAGGTCAGAAAA  
AGAGTGCACGCCAGTATCACGTACAGTTCTTTGGTGACGCCCCAGAAAGAGCTTGGAA  
TATTTGAGAAGAGCCTCGTAGCTTTTGAAGGAGAAGGACAGTTTTGAAAAATTATGCC  
AGGAAAGTGCCAAGCAGGCACCCACGAAAGCTGAGAAAATTAAGCTATTGAAACCAA  
TTTCAGGGAAATTGAGGGCCAGTGGGAAATGGGCATTGTTCAAGCAGAAGAAGCTG  
CAAGCATGTCAGTGGAGGAGCGGAAAGCCAAGTTCACCTTTCTCTATGTGGGGGACC  
AGCTTCATCTCAACCTCAAGTAGCCAAGGAGGCTGGCATTGCTGCAGAGTCTTTGG  
GAGAAATGGCAGAATCCTCAGGAGTCAGTGAAGAAGCTGCTGAAAACCCCAAGTCTG  
TGAGAGAAGAGTGCAATCCCATGAAGAGAAGGCGGAGGGCCAAACTGTGTAGCTCTG  
CAGAGACCTGGAGAGTCACCCCGACATAGGGAAGAGTACTCCTCAAAGACGGCAG  
AGGCTGACCCAGAAAGAGGAGTAGGGTCTCCTCCTGGGAGGAAGAAGACCACAGTCT  
CCATGCCACGAAGCAGGAAGGGAGATGCAGCATCCAGTTTTTTGGTCTTCTGTCAAA  
AACACAGGGATGAGGTGGTAGCTGAGCACCCAGATGCTTCAGGTGAGGAGATTGAAG  
AGCTGCTCAGGTACAGTGGAGTCTGCTGAGTGAAGAAGCAGAGAGCACGCTACAACA  
CCAAGTTTGCCCTGGTGGCCCCTGTCCAGGCTGAAGAAGACTCTGGTAATGTAAATG  
GGAAAAAAGAAACCACAAAAGAGGATACAGGACCCTACAGAAGATGCTGAAGCTG  
AGGACACACCCAGGAAAAGACTCAGGACGGACAAGCACAGTCTTCGGAAG

The sequences of shRNA targeting circWHSC1 are:

Top strand:

GATCCGAGTCTTCGGAAGTGTCTAAGAACTTCAAGAGAGTTCTTAGAAC  
ACTTCCGAAGACTTTTTTTC

Bottom strand:

AATTGAAAAAAGTCTTCGGAAGTGTCTAAGAACTCTCTTGAAGTTCTTA  
GAACACTTCCGAAGACTCG

The sequences of probe against circWHSC1 are:

CAGAUGCUUCCGUUCUAGAACACUCCGAAGACUGUG
